# Supplementary material for: RETRACTED ARTICLE: Supported black phosphorus nanosheets as hydrogen-evolving photocatalyst achieving 5.4% energy conversion efficiency at 353 K
Source: PubMed Central journal article supplement (PMC5895612; doi:10.1038/s41467-018-03737-4), 2018-04-11
Supplement: 41467_2018_3737_MOESM2_ESM.pdf [file 41467_2018_3737_MOESM2_ESM.pdf]

## **Description of Additional Supplementary Files**

File Name: Supplementary Movie 1

Description: Hydrogen evolution over the Co-P/BP nanosheets in pure water irradiated by Xe lamp ( $\lambda \geq 420$  nm) displayed in Supplementary Movie 1. Obvious bubbles can be seen when the solution is irradiated.
